## 22 Abstract

23 An effective and pain-free killing method is required to achieve the goal of euthanasia, a “good  
24 death”. Overdose of sodium pentobarbital (PB) by intraperitoneal (IP) injection is a widely  
25 accepted technique, but questions remain regarding pain associated with administration. As PB  
26 rapidly causes sedation and loss of consciousness, most studies have relied on indirect evidence  
27 of pain. The objective of this study was to assess pain associated with IP PB using an appropriate  
28 vehicle control.

29 Adult male and female Sprague Dawley (SD) and female Wistar rats (N = 112) were block  
30 randomised by sex and strain to receive one of four treatments: 1) 800 mg/kg PB (pH 11); 2) 800  
31 mg/kg PB with 4 mg/kg lidocaine (PB+lido); 3) saline or 4) vehicle controls (pH 11 or 12.5).  
32 Behavior (Rat Grimace Scale [RGS], writhing, back arching) was evaluated at baseline, before  
33 loss of righting reflex (PB and PB+lido groups), 80s, 151s and 10 min post-injection (PI; saline  
34 and vehicle control groups).

35 In the vehicle control groups, the RGS scores were increased at 151s PI (SD:  $p = 0.0008$ , 95%CI  
36  $-0.731$  to  $-0.202$ ) from baseline, as was relative frequency of writhing (SD:  $p < 0.00001$ ; Wistar;  
37  $p = 0.0004$ ). RGS scores remained elevated 10 mins PI (SD:  $p = 0.0070$ , 95%CI  $-0.768$  to  $-0.118$ ;  
38 Wistar:  $p = 0.0236$ , 95%CI  $-0.907$  to  $-0.0742$ ) but the relative frequency of writhing did not ( $p >$   
39  $0.05$ ). The RGS scores and the relative frequency of writhing remained low in the PB, PB+lido  
40 and saline groups ( $p > 0.05$ ). Back arching increased from baseline in the PB+lido group before  
41 loss of righting reflex and in the vehicle control group (SD rats) at 151s PI ( $p < 0.05$ ).

42 These results show that IP PB results in signs associated with pain. The sedative effects of PB  
43 limit behavioral assessment.



## 45 Introduction

46 Approximately 9 million mice and rats are used in biomedical research in Canada and the European  
47 Union annually. [1, 2] As the majority of animals are killed at project completion (or when a humane  
48 endpoint is reached), an effective, fast and pain-free killing method is essential.  
49 Two methods are generally considered to be acceptable: 1) injection of barbiturates, such as sodium  
50 pentobarbital (PB), and 2) an overdose of an inhalant anesthetic. [1, 3] The use of inhalant anesthetics for  
51 euthanasia has been reported as aversive to rodents. [1, 4, 5] Therefore, the intraperitoneal (IP) injection  
52 of an overdose of PB is widely considered to be a preferable method of euthanasia. [1, 3] The effect of IP  
53 PB has been reported to be quick with loss of righting reflex (LORR) and cessation of heart beat (CHB)  
54 occurring within approximately 111s and 283s, respectively, with 800 mg/kg PB. [6] However, it has  
55 been suggested that the highly alkali pH of PB may cause pain upon injection [7] and current guidelines  
56 recommend the use of local anesthetics, such as lidocaine, in conjunction with the IP injection of PB to  
57 minimize this effect. [1, 3] Few studies have explored the potential for pain or defined methods to assess  
58 pain associated with this killing method to support the addition of local anesthetics to the injectate.  
59 Studies that have explored pain associated with IP injection of PB report that while some behaviors  
60 associated with pain increase (e.g. writhing) others remain unchanged (e.g. the Rat Grimace Scale  
61 (RGS)). [8-10] Importantly, these studies did not account for the sedative effects of PB and the potential  
62 to interfere with behaviors used to evaluate pain, which may explain these conflicting results.  
63 The aim of this study was to assess if the injection of a vehicle control (with a similar pH to PB) is  
64 painful. It was hypothesized that pain behaviors would increase after the injection of a vehicle control but  
65 not following injection of PB.

## 66 Methods

### 67 Ethical statement

68 This study was approved by The Health Sciences Animal Care Committee at the University of Calgary  
69 (Animal Use Protocol AC11-0044) and was performed in accordance with the Canadian Council on  
70 Animal Care Euthanasia Guidelines (2010) and the Canadian Association of Laboratory Medicine  
71 (CALAM) Standards of Veterinary Care (2007).

### 72 Experimental Animals/Housing and Husbandry

73 Adult male (n = 48, 359g [201 to 440g] [median, range]) and female (n = 53, 263g [196 to 448g])  
74 Sprague Dawley (SD) surplus rats were obtained from the University of Calgary Health Sciences Animal  
75 Resources Centre (HSARC). Female Wistar rats (n = 50, 239.5g [212 to 265g]) were obtained from  
76 Charles River Canada. Animals were housed in pairs in polycarbonate cages (47.6 x 26.0 x 20.3 cm,  
77 RC88D-UD, Alternate Design Mfg and Supply, Siloam Springs, Arizona, USA) with a bedding of wood  
78 shavings (Aspen chip, NEPCO, Warrensburg, NY, USA) and enrichments of a PVC tube, sizzle paper  
79 and nestlets. Rats were provided food (Prolab 2500 Rodent 5p14, Laboratory Animal Diet, LabDiet, St  
80 Louis, MO, USA) and tap water *ad libitum*. The housing environment consisted of a 12-hour light-dark  
81 cycle (light on at 7 am) and temperature and humidity of 23°C and 22%, respectively.  
82 Animals were block randomised (list randomizer, random.org) by sex and strain to receive one of four  
83 treatments: 1) 800 mg/kg pentobarbital (PB, Euthanyl, 240 mg/mL, Bimeda-MTC Animal Health Inc.,  
84 Cambridge, ON, Canada, pH of 11.018 ± 0.009 upon testing); 2) 800 mg/kg PB with 4 mg/kg lidocaine  
85 (PB+lido, Lidocaine Neat, 20 mg/mL, Pfizer Animal Health, Pfizer Canada Inc., Kirkland, QC, Canada);  
86 3) Saline controls at 3.33 mL/kg (Sodium Chloride 0.9% Injection, FK Std., Fresenius Kabi Canada,  
87 Mississauga, ON, Canada; volume equal to PB) and 4) vehicle controls (SD: vehicle control pH of 11.0 at  
88 3.33 mL/kg. Wistars: vehicle control pH of 12.5 at 3.33 mL/kg). [7] Vehicle controls were prepared as:  
89 propylene glycol (40%), ethanol (10%), water for injection and pH balanced to pH 11 or 12.5 (Chief

90 Pharmacy, Calgary, AB, CAN and Chiron Compounding Pharmacy Inc., Guelph, ONT, CAN). Each  
91 injection was prepared in a 3 mL syringe with a 25 gauge 5/8" needle and 0.01 mL of blue food colouring  
92 added (Blue Food Colour, Club House, McCormick Canada, London, Canada). Rats were excluded and  
93 replaced if misinjection was confirmed at necropsy. Both experimenters (JR, CS) were blinded to the  
94 treatments and all assessments were performed between 7 am and 6 pm.

## 95 Video recording (for behavioral assessments)

96 Three days before the experimental day, all rats were habituated daily to handling by the experimenters  
97 (JR and CS) and placement in the observation chamber (14 x 27 x 21 cm) for 10 minutes. During  
98 handling, both experimenters habituated the rat to the two-person injection technique: one experimenter  
99 (CS) cradled the rat in a backpack hold in dorsal recumbency with a 30° head down angle and extended  
100 the left pelvic limb. The other experimenter extended the right pelvic limb while simultaneously holding a  
101 capped hypodermic needle against the abdominal wall of the right caudal quadrant at a 45° angle to the  
102 body wall, as previously described. [6]

103 On the testing day, animals were weighed before placement into the observation box for baseline  
104 recording (Panasonic HC-V720P/PC, Panasonic Canada Inc., Mississauga, ON, Canada) for 10 minutes.  
105 Rats were then removed from the box and given a single intraperitoneal (IP) injection using the two-  
106 person injection technique. After injection (INJ), rats were immediately returned to the observation  
107 chamber for observation and video-recording until loss of righting reflex (LORR) occurred or until 10  
108 minutes elapsed (whichever came first). At the first signs of ataxia, LORR was assessed by attempting to  
109 place the rat in left lateral recumbency, followed by dorsal recumbency. If the rat remained on its back  
110 for 10 seconds LORR was considered to be achieved. If the rat righted itself, LORR was reassessed every  
111 30 seconds until achieved or up to 10 minutes. Following LORR, the animal was monitored for cessation  
112 of breathing (CB, visual assessment). At CB, the animal was placed in left lateral recumbency and  
113 monitored for cessation of heartbeat (CHB, thoracic auscultation with stethoscope). If CHB did not occur  
114 within 20 minutes of injection, the rat was euthanized with an overdose of inhaled isoflurane (IsoFlo®,

115 Abbot Animal Health, Abbott Laboratories, North Chicago, IL, USA). Times to achieve LORR, CB and  
116 CHB were recorded. These physiologic data were collected for PB and PB+lido group animals.

## 117 Behavioral assessments

118 Image collection for RGS scoring and behavioral assessments were performed by observers (JR and VL)  
119 blinded to treatment. For RGS scoring, an image was selected at three-minute intervals when the rats were  
120 not performing behaviors that could influence facial expressions (i.e. sleeping, sniffing, eating and  
121 grooming). Three images were collected during the 10 minute baseline video for each animal. For post-  
122 injection (PI) videos of animals that had LORR, three images were selected before LORR occurred  
123 (duration ranged from 56 to 105s). For PI videos in which LORR did not occur, three images were  
124 selected from each of the following intervals: first 80s of the video (average time to achieve LORR), from  
125 a 30s segment of the video (121 to 151s after IP injection, based on data showing LORR may not be  
126 achieved for up to 151s) [6] and during the last minute of observation (9 to 10 minutes after IP injection).  
127 Collected images were inserted into commercial presentation software (Microsoft PowerPoint, version  
128 15.0, Microsoft Corporation, Redmond, WA, USA) and randomized with a macro ([http://www.tushar-](http://www.tushar-mehta.com/powerpoint/randomslideshow/index.htm)  
129 [mehta.com/powerpoint/randomslideshow/index.htm](http://www.tushar-mehta.com/powerpoint/randomslideshow/index.htm)). Each image was assessed as previously described.  
130 [11] Briefly, four action units (orbital tightening, ear changes, nose/cheek flattening and whisker changes)  
131 were scored from 0 to 2 (increasing score represents increasing pain). The following behaviors were  
132 assessed as relative frequencies: writhing and back arching. [12] These behaviors were identified over the  
133 first 151s of both BL and PI videos or before LORR. Writhing was defined as the contraction of the  
134 lateral abdominal walls where the abdomen appears concave. Writhing was also assessed before LORR or  
135 during the first 80s PI and during the last minute (9-10 minutes PI, where LORR did not occur). Back  
136 arching was defined as the arching of the back (with the abdomen pushed towards the ground or a vertical  
137 upwards arch).

## 138 Necropsy

139 Skin was incised along the midline from the sternum to pubis and reflected back using blunt dissection.  
140 The linea alba was incised and the muscles along the costal arch were cut to expose the peritoneal cavity,  
141 which was photographed with viscera in place. The gastrointestinal tract from cardia to descending colon  
142 was then removed and any sections with blue staining opened to determine if staining was serosal or  
143 intraluminal. The liver, abdominal wall surrounding the injection site, and excised gastrointestinal tract  
144 were placed in 10% neutral buffered formalin solution for fixation of at least 7 days.

## 145 Histological analysis

146 For histologic analysis, formalin-fixed samples of liver, gastrointestinal tract and abdominal wall  
147 muscle were embedded in paraffin, sectioned at 4 micrometer thickness and stained routinely  
148 with haematoxylin and eosin (H&E) stain. Samples were not collected from animals in which a  
149 misinjection was strongly suspected based on initial gross evaluation of abdominal contents.  
150 Slides were evaluated by a US board-certified veterinary pathologist (CGK) blinded to treatment  
151 for evidence of mesothelial (peritoneal) and submesothelial damage or inflammation.

## 152 153 Statistical Analysis

154 Data were analysed with commercial statistical software (Prism 6.07, GraphPad Software, La  
155 Jolla, CA, USA). Normality was assessed with the D'Agostino-Pearson omnibus normality test.  
156 Physiologic data and RGS scores approximated a normal distribution while the relative  
157 frequency of writhing and back arching did not. An unpaired t-test was used to assess the  
158 differences between PB and PB+lido animals to achieve LORR, CB and CHB. Differences from  
159 baseline were assessed with a paired t-test, Wilcoxon test (for PB and PB+lido data), one-way  
160 ANOVA or a Friedman's test (post-hoc Dunn's, for saline and vehicle control data). Strains were



161 analysed separately because of the different pH levels of the vehicle controls. Sample sizes were  
162 estimated (G\*Power 3.1.9.2, Germany) for the two main behavioral outcomes: RGS and  
163 writhing. For the RGS, a sample size of 12 animals per group was estimated based on: alpha =  
164 0.05, power = 0.8, SD = 0.25 and expected mean difference of 0.3. [11] For writhing, a sample  
165 size of 12 animals per group was estimated based on: alpha = 0.05, power = 0.8, SD = 4.74 and  
166 expected difference of 6. [12] A p-value of < 0.05 was considered statistically significant for all  
167 comparisons and 95% confidence intervals for the mean/median difference presented where  
168 available. Data in the figures are presented as mean  $\pm$  SEM (RGS) or as median  $\pm$  IQR (relative  
169 frequency of back arch and writhing). Data in text are presented as mean  $\pm$  standard deviation.  
170 Data supporting the results are available in an electronic repository (Harvard Dataverse): XXX.

## 171 Results

172 The misinjection rate was 25.2% (38/151), similar to previous studies. [6, 13-15] These rats were  
173 excluded from analysis. An additional rat was excluded due to a dosing error. The total number  
174 of SD females, SD males and Wistar females were n = 40, n = 36 and n = 36 respectively. As  
175 block randomization was maintained, these animals were divided equally into the four treatment  
176 groups: SD females (n = 10) SD males (n = 9) and Wistar females (n = 9). A maximum of 984  
177 images could be captured for RGS assessment. The successful image capture rate was 99.7%  
178 with only three images that could not be captured from two rats because they were grooming  
179 during the majority of the observation period. Tissue samples were collected from 100 rats. Due  
180 to a planning error, formalin was unavailable for sample storage in 30 rats. Samples were not  
181 taken from 20 rats as misinjection was identified at initial necropsy. Samples from 17 rats were  
182 excluded because of misinjections identified during histological examination. There were 26  
183 samples from SD male (PB and PB+lido: n = 4, saline: n = 7, VC: n = 11), 33 from SD female

184 (PB, PB+lido and vehicle: n = 8, saline: n = 9) and 24 from Wistar female rats (PB and PB+lido:  
185 n = 3, saline and vehicle: n = 9).

186 There were increases in some behaviors, such as the RGS and writhing. These changes were only  
187 observed in animals that received vehicle controls and during the 151s and 10 mins PI periods.

## 188 RGS

189 Increases in RGS scores were only observed in the rats that received the vehicle controls (SD: F  
190 (2.3, 41) = 8.8, p = 0.0004; Wistar: F (2.0, 16) = 6.4, p = 0.009; Fig. 1a, b). There were increases  
191 in RGS scores from BL after 10 min PI (SD: p = 0.007, 95% CI -0.77 to -0.12; Wistar: p = 0.024,  
192 95% CI -0.91 to -0.074). Increases from BL at 151s PI was also observed in the SD rats (p =  
193 0.0008, 95% CI -0.73 to -0.20) but not in the Wistar rats (p = 0.188, 95% CI -0.85 to 0.16). The  
194 mean of these scores also crossed a previously established intervention threshold of 0.67. [16]  
195 The RGS scores at 80s remained similar to BL (SD: p = 0.247, 95% CI -0.36 to 0.073; Wistar: p  
196 > 0.999, 95% CI -0.23 to 0.23).

197

198

199 **Fig 1. The RGS scores of rats that received sodium pentobarbital (PB), PB with lidocaine**  
200 **(PB+lido), saline controls (Control (SAL)) or vehicle controls (Control (pH 11 or 12.5)). (a)**  
201 In the female and male Sprague Dawley group, significant increases from baseline were  
202 observed from the vehicle control group at the 151s and 10 min post-injection (PI) timepoints (p  
203 < 0.01). (b) In the female Wistar group, a significant increase from baseline was only observed at  
204 10 min PI timepoint in the vehicle control group (p < 0.05). The horizontal dotted line represents

205 a previously established threshold of 0.67. [16] Data presented as mean  $\pm$  SEM. \* $p < 0.05$ , \*\* $p <$   
206 0.01, \*\*\* $p < 0.001$ .

207

208

209 The PI RGS scores of animals which received PB (SD:  $p = 0.876$ , 95% CI -0.14 to 0.17; Wistar:  
210  $p = 0.100$ , 95% CI -0.034 to 0.31), PB+lido (SD:  $p = 0.743$ , 95% CI -0.17 to 0.24; Wistar:  $p =$   
211 0.165, 95% CI -0.08 to 0.37) or saline (SD:  $F(2.4, 44) = 1.8$ ,  $p = 0.173$ ; Wistar:  $F(2.2, 18) = 1.3$ ,  
212  $p = 0.300$ ) displayed similar scores to BL.

## 213 Writhing

214 Similar to RGS scores, increases in the relative frequency of writhing behaviors were observed  
215 in the animals that received the vehicle controls (SD and Wistar:  $p < 0.0001$ ; Fig. 2a, b). A  
216 higher relative frequency of writhing was observed at 151s PI compared to BL (SD:  $p < 0.00001$ ;  
217 Wistar;  $p = 0.0004$ ). However, at 80s (SD:  $p = 0.114$ ; Wistar:  $p = 0.085$ ) and 10 min PI (SD and  
218 Wistar:  $p > 0.999$ ) the relative frequency of writhing was similar to BL. In PB, PB+lido and  
219 saline treatment groups, the relative frequency of writhing did not increase PI (PB; SD:  $p >$   
220 0.999; Wistar:  $p > 0.999$ . PB+lido; SD:  $p = 0.250$ ; Wistar:  $p > 0.999$ . Saline controls; SD:  $p =$   
221 0.392; Wistar:  $p = 0.706$ , Fig 2a, b).

222

223

224 **Fig 2. The relative frequency of writhing displayed by rats treated with sodium**  
225 **pentobarbital (PB), PB with lidocaine (PB+lido), saline controls (Control (SAL)) or vehicle**

226 **controls (Control (pH 11 or 12.5)).** Significant increases from baseline (BL) were only  
227 observed at the 151s post-injection (PI) timepoint in both female and male Sprague Dawley rats  
228 ( $p < 0.0001$ , a) and female Wistar rats ( $p < 0.001$ , b). Data presented as median  $\pm$  IQR. \*\*\* $p <$   
229  $0.001$ , \*\*\*\* $p < 0.0001$ .

230

231

232 Upon visual inspection of the data, a sex effect was apparent: SD males in the vehicle control  
233 groups displayed a lower relative frequency of writhing behavior in comparison to the female SD  
234 rats (Suppl. Fig. 1a, b). A higher relative frequency of writhing was observed in female SD rats  
235 that received vehicle controls at 151s PI only ( $p < 0.0001$ ) but not in male rats ( $p = 0.249$ ). The  
236 relative frequency of writhing was similar to baseline at all other timepoints in both SD males  
237 and females that received the vehicle controls (at 80s PI; males:  $p > 0.999$ , females:  $p = 0.113$ . at  
238 10 min PI; males:  $p > 0.999$ , females:  $p = 0.896$ ). Of animals that received saline, there were no  
239 differences from baseline in the SD males (80s, 151s and 10 min PI:  $p > 0.999$ ). There were no  
240 significant differences from BL in writhing behavior in the PB and PB+lido groups (PB; female:  
241  $p > 0.999$ ; male:  $p = 1.00$ . PB+lido: female:  $p = 0.500$ ; male  $> 0.999$ ).

## 242 **Back arching**

243 SD rats in the PB+lido and vehicle control groups expressed back arching more frequently  
244 during the PI period than at BL (PB+lido and vehicle control:  $p = 0.031$ ; Fig. 3a, b). This  
245 increased frequency during PI was not observed in Wistar rats (PB+lido:  $p = 0.250$ , vehicle  
246 control:  $p = 0.063$ ). For both SD and Wistar rats that received PB or saline, the relative frequency

247 of back arching was similar to baseline (PB: SD;  $p = 0.250$ , Wistar;  $p > 0.999$ . Saline: SD;  $p =$   
248  $0.313$ , Wistar:  $p > 0.999$ ).

249

250

251 **Fig 3. The relative frequency of back arching displayed by rats treated with sodium**  
252 **pentobarbital (PB), PB with lidocaine (PB+lido), saline control (Control (SAL)) or vehicle**  
253 **controls (Control (pH 11)).** (a) With the female and male Sprague Dawley rats, significant  
254 increases from baseline (BL) were only observed in the PB+lido group before loss of righting  
255 reflex (LORR) and in the vehicle control group at the 151s PI timepoint ( $p < 0.05$ ). (b) With  
256 female Wistar rats, there were no significant differences from BL at all timepoints and in the  
257 different treatment groups ( $p > 0.05$ ). Data presented as median  $\pm$  IQR. \* $p < 0.05$ .

258

259

260 Visual inspection of the data for sex differences was also performed and no differences were  
261 apparent (Suppl. Fig. 2a, b). Comparisons to BL did not reveal significant increases when the  
262 sexes were separated (PB; females:  $p = 0.500$ , males:  $p = 0.999$ . PB+lido; females:  $p = 0.125$ ,  
263 males:  $p = 0.500$ . saline; females:  $p > 0.999$ , males  $p = 0.500$ . vehicle control; females:  $p =$   
264  $0.125$ , males:  $p = 0.500$ ).

## 265 Physiologic data

266 There were no significant differences between animals in the PB and PB+lido treatment groups  
267 for each endpoint: INJ to LORR; PB:  $78 \pm 7.9s$ , PB+lido:  $78 \pm 11s$ ,  $p = 0.91$ , 95% CI -4.71 to

268 5.28. LORR to CB; PB:  $90 \pm 19s$ , PB+lido:  $94 \pm 15s$ ,  $p = 0.35$ , 95% CI -4.85 to 13.64. CB to  
269 CHB; PB:  $84 \pm 16s$ , PB+lido:  $85 \pm 17s$ ,  $p = 0.73$ , 95% CI -7.30 to 10.30. INJ to CHB; PB:  $252 \pm$   
270  $24s$ , PB+lido:  $255 \pm 20s$ ,  $p = 0.64$ , 95% CI -9.13 to 14.7). Overall, the time between INJ to  
271 LORR, LORR to CB, CB to CHB and from INJ to CHB were  $78 \pm 9.2s$ ,  $92 \pm 17s$ ,  $85 \pm 16s$  and  
272  $254 \pm 22s$ , respectively, for pooled data from PB and PB+lido groups. Twenty-five rats that  
273 received a misinjection of either PB or PB+lido achieved LORR at  $149.9 \pm 79.4s$  (range 74 to  
274 347s).

## 275 Histologic analysis

276 Each of the 83 slides included up to 7 representative sections of small and large intestine (3 gut  
277 sections:  $n = 9$ ; 4 gut sections:  $n = 26$ ; 5 gut sections:  $n = 33$ ; 6 gut sections:  $n = 14$ ; 7 gut  
278 sections:  $n = 1$ ). The majority of slides included a section of liver ( $n = 81$ ). Thirty-five included a  
279 section of abdominal wall and 12 included a section of pancreas attached to the associated  
280 duodenal segment. No evidence of mesothelial or submesothelial damage or inflammation was  
281 seen in any section aside from rare foci of mechanical trauma caused by the injection needle.

## 282 Discussion

283 The results of this study show that: 1) IP injection of PB is painful and the source of pain is the  
284 alkali pH and 2) behaviors associated with pain are masked by the presence of PB.

285 As outlined in the CCAC [1] and AVMA [3] euthanasia guidelines, during the euthanasia of  
286 animals distress and pain must be minimized. The use of barbiturates, such as sodium  
287 pentobarbital, is designated as an acceptable method and preferred over other methods, such as  
288 inhalant anesthetics, because they are fast acting, inexpensive, readily available, have a long

289 shelf life and are supposedly less aversive. [3] However, the methods to assess pain associated  
290 with IP PB have not been well defined. [3]

291 The highly alkali pH of PB solution (typically pH 11-12) has been suggested as a cause of pain  
292 when delivered IP. [1, 7] A few studies have reported that pain is present during IP PB injection  
293 because of changes in behaviors (i.e. increase writhing and reduction of locomotion and rearing,  
294 directed grooming [7, 8, 10, 17] levels of molecular markers (i.e. increase of spinal c-fos [9]) and  
295 the appearance of redness in the peritoneal cavity, indicative of inflammation. [10] Studies have  
296 also reported that writhing and spinal c-fos levels decreased when a local anesthetic, such as  
297 lidocaine or bupivacaine, was administered. [8-10] These results suggest that pain may be  
298 associated with IP PB injections. Unfortunately, not all of these studies have undergone peer  
299 review. [7, 10] Interpretation of changes in molecular markers alone is challenging as expression  
300 is altered by neuronal activation that may not be specific to nociception and nociception is not  
301 necessarily indicative of pain. [9, 18] Furthermore, short periods of nociceptive input, as seen  
302 during successful IP PB injection, are difficult to identify using changes in expression of many  
303 molecular markers. [18] Additionally, a failure to document a behavior in the presence of a drug  
304 causing sedation and reduced motor function, such as PB, should be interpreted cautiously. This  
305 could explain the apparent failure of the RGS to change following IP PB in one study. [8, 17] A  
306 novel approach, evaluating behavior directed at an alternative injection site (intra-plantar)  
307 reported low instances of paw licking, which were similar between mice injected with PB or  
308 saline. [17] Previous work has shown that loss of consciousness (as assessed with LORR) takes  
309 approximately 151 seconds to occur following injection (PB dose of 800 mg/kg) in rats. [6] This  
310 highlights the short window of opportunity for observations. This study was designed to clarify

311 the role of pH in eliciting pain and explore the role of different behavioral outcomes in  
312 identifying pain over a relevant time frame.

313 Several behaviors have been used to study abdominal pain (often following laparotomy). [11, 12,  
314 19] Of these, the grimace scales and writhing behavior were selected as they have also been  
315 shown to increase with exposure to a noxious substance injected IP and decrease with analgesics.  
316 [19, 20]. Back arching was reported to increase after laparotomy [12] but has not been  
317 specifically reported to increase in response to the IP injection of noxious substances in rodents.  
318 Unfortunately, these behaviors did not change reliably in this study (i.e. changes observed in PB  
319 or pH control groups).

## 320 Writhing behavior

321 An increase in writhing behavior was observed only in the vehicle control groups at 151s PI and  
322 not in the PB groups. This differs from previous studies that reported an increase in writhing  
323 duration after IP injection of PB and the presence, though at a low incidence, of writhing after IP  
324 PB. [6, 8] These differences may result from the different methods of assessing writhing (relative  
325 frequency vs duration vs presence/absence). While writhing duration would be expected to be  
326 affected by the PB dose used (and consequent time to onset of sedation), the dose range  
327 employed by Khoo et al. [8] was similar (approximately 590-930 mg/kg) to that used in this  
328 study. Unfortunately, differences in methodology (duration versus relative frequency of  
329 writhing) preclude direct comparisons between these studies. We elected to use relative  
330 frequency to account for the different observation periods between individuals and treatment  
331 groups. Zatroch et al. [6] reported writhing in fewer than 50% of animals injected with either 200  
332 or 800 mg/kg PB and observed writhing in a small number of animals (n = 2/9) receiving a saline  
333 control injection, highlighting the importance of this control. Interestingly, in the study reported



334 here, writhing behavior was not sustained at the 10 minute observation period. This could reflect  
335 a reduction in pain over time or perhaps an increase in pain to a level that inhibited further  
336 writhing.

337 An unexpected effect of sex was observed, with male SD rats displaying fewer bouts of writhing  
338 than females. The source of this difference is unknown. However, this effect of sex was not  
339 maintained with the RGS scores, suggesting that other factors may have been involved.

## 340 RGS

341 Similar to writhing behaviors, RGS scores only increased significantly in the vehicle control  
342 groups. In contrast to the writhing data, the RGS scores were increased at both 151s and 10  
343 minute time points, and the average scores were close to or exceeded a previously established  
344 threshold associated with pain. [16] The maintenance of low RGS scores in the PB treated  
345 animals and increase in scores in the vehicle control group highlights the potential for agents  
346 with sedative/anesthetic properties to mask behavioral expression. This is a likely explanation for  
347 the failure of RGS scores to change in the study of Khoo et al. [8]

348 The results from both writhing and RGS observations indicate that an IP injection of PB is  
349 painful due to the alkali pH of the injectate. The low relative frequency of writhing and the low  
350 RGS scores in the PB groups support our hypothesis that the sedative effect of PB inhibits  
351 behavioral expression. Importantly, neither writhing nor RGS scores were increased at the 80s  
352 time point, suggesting that the onset of pain occurs after this time. Therefore, if loss of  
353 consciousness occurs rapidly, it is possible that pain may not be experienced following IP PB.  
354 This has important implications for situations in which time to unconsciousness is delayed, such  
355 as with misinjection and perhaps with lower doses of PB. [6] Animals that received a low dose

356 and low volume of PB (200 mg/kg) took on average 25% longer to achieve LORR. [6] Our study  
357 also reported that rats which received a misinjection of PB take longer to achieve LORR.  
358 Unfortunately, it appears that misinjections are always possible, in part due to the variable  
359 location of the cecum. [6, 14, 15, 21]

## 360 Histology

361 Histologic examination of the serosal surfaces of abdominal organs harvested from rats  
362 euthanized by IP injection does not offer information about pain associated with the procedure.  
363 Organs were evaluated for evidence of acute inflammation, including serosal and subserosal  
364 vasodilation and vascular congestion, neutrophilic margination and transmigration, mesothelial  
365 cell swelling, or mesothelial cell necrosis and sloughing. None of these features were seen, and  
366 no treatment group differences were detected by a blinded pathologist. This was not unexpected,  
367 as most histologic changes associated with acute inflammation take longer than 20 minutes to  
368 develop, which was the maximum interval between injection and death in this trial. The  
369 exception to this is vasodilation / active hyperemia, which can occur seconds to minutes after  
370 injury. Grossly visible peritoneal and serosal reddening has been previously described after IP  
371 PB injection, [10, 17] but this was not seen in this trial, however. Histologically, it is difficult to  
372 attribute significance to the presence or absence of red blood cells in blood vessels for several  
373 reasons. While the heart is still active blood may redistribute around the time of death through  
374 dysregulated autonomic control of vessels. After death, blood may redistribute under the  
375 influence of gravity. Blood can also be lost from vessels during tissue trimming and histologic  
376 processing. Finally, physiologic hyperemia due to digestion and peristaltic activity may cause  
377 intestinal sections to appear congested; this should not be interpreted as peracute inflammation.

378 Therefore, although gross reddening of serosal surfaces caused by IP PB injection cannot be  
379 ruled out, it was not seen in this trial and was not supported histologically.

### 380 Limitations and future studies

381 A limitation of this study was the omission of a treatment group of a vehicle control combined  
382 with a local anesthetic. This is a necessary step to confirm if the use of a local anesthetic is  
383 effective in providing analgesia to counteract the pain associated with PB. This study only used  
384 one dose of PB. This dose was selected from previous work demonstrating benefits in terms of a  
385 faster death and reduced variability of effects. [6, 14, 15, 21]

386 In conclusion, IP injection of PB is painful, as indicated by the presence of behaviors associated  
387 with pain observed during vehicle control injections. Furthermore, these results highlight the  
388 importance of a vehicle control group and the limitations of interpreting behaviors in the  
389 presence of an agent with sedative properties, such as PB.

390

391

- 392 1. CCAC guidelines on: euthanasia of animals used in science. 2010.
- 393 2. Seventh report on the statistics on the number of animals used for experimental and other  
394 scientific purposes in the member states of the European Union. 2013.
- 395 3. AVMA guidelines. 2013.
- 396 4. Leach MC, Bowell VA, Allan TF, Morton DB. Aversion to gaseous euthanasia agents in rats and  
397 mice. *Comp Med*. 2002;52(3):249-57. Epub 2002/07/10. PubMed PMID: 12102571.
- 398 5. Makowska IJ, Weary DM. Rat aversion to induction with inhalant anaesthetics. *Applied Animal  
399 Behaviour Science*. 2009;119(3):229-35. doi: <https://doi.org/10.1016/j.applanim.2009.04.003>.
- 400 6. Zatroch KK, Knight CG, Reimer JN, Pang DSJ. Refinement of intraperitoneal injection of sodium  
401 pentobarbital for euthanasia in laboratory rats (*Rattus norvegicus*). *BMC Vet Res*. 2017;13(1):60-. doi:  
402 10.1186/s12917-017-0982-y. PubMed PMID: 28222732.
- 403 7. Ambrose N. Refinement of routine procedures on laboratory rodents. 1999.
- 404 8. Khoo SYS, Lay BPP, Joya J, McNally GP. Local anaesthetic refinement of pentobarbital euthanasia  
405 reduces abdominal writhing without affecting immunohistochemical endpoints in rats. *Lab Anim*.  
406 2017;52(2):152-62. doi: 10.1177/0023677217721260.

- 407 9. Svendsen O, Kok L, Lauritzen B. Nociception after intraperitoneal injection of a sodium  
408 pentobarbitone formulation with and without lidocaine in rats quantified by expression of neuronal c-  
409 fos in the spinal cord--a preliminary study. *Lab Anim.* 2007;41(2):197-203. Epub 2007/04/14. doi:  
410 10.1258/002367707780378140. PubMed PMID: 17430619.
- 411 10. Wadham JJB. Recognition and reduction of adverse effects in research on rodents. 1996.
- 412 11. Sotocinal SG, Sorge RE, Zaloum A, Tuttle AH, Martin LJ, Wieskopf JS, et al. The Rat Grimace Scale:  
413 a partially automated method for quantifying pain in the laboratory rat via facial expressions. *Mol Pain.*  
414 2011;7:55. Epub 2011/08/02. doi: 10.1186/1744-8069-7-55. PubMed PMID: 21801409; PubMed Central  
415 PMCID: PMC3163602.
- 416 12. Roughan JV, Flecknell PA. Behavioural effects of laparotomy and analgesic effects of ketoprofen  
417 and carprofen in rats. *Pain.* 2001;90(1-2):65-74. doi: 10.1016/s0304-3959(00)00387-0. PubMed PMID:  
418 WOS:000167198400008.
- 419 13. Ballard T. Intraperitoneal route of administration - how accurate is this technique? *Animal*  
420 *Technology and Welfare.* 2009;8(1):17-8.
- 421 14. Coria-Avila GA, Gavrilina AM, Menard S, Ismail N, Pfaus JG. Cecum location in rats and the  
422 implications for intraperitoneal injections. *Lab Anim (NY).* 2007;36(7):25-30. Epub 2007/06/23. doi:  
423 10.1038/labani0707-25. PubMed PMID: 17585354.
- 424 15. Lewis RE, Kunz AL, Bell RE. Error of intraperitoneal injections in rats. *Laboratory animal care.*  
425 1966;16(6):505-9. Epub 1966/12/01. PubMed PMID: 4291449.
- 426 16. Oliver V, De Rantere D, Ritchie R, Chisholm J, Hecker KG, Pang DSJ. Psychometric Assessment of  
427 the Rat Grimace Scale and Development of an Analgesic Intervention Score. *Plos One.* 2014;9(5). doi:  
428 10.1371/journal.pone.0097882. PubMed PMID: WOS:000339614800081.
- 429 17. Dutton JW, 3rd, Artwohl JE, Huang X, Fortman JD. Assessment of Pain Associated with the  
430 Injection of Sodium Pentobarbital in Laboratory Mice (*Mus musculus*). *J Am Assoc Lab Anim Sci.*  
431 2019;58(3):373-9. Epub 2019/03/13. doi: 10.30802/AALAS-JAALAS-18-000094. PubMed PMID:  
432 30857577; PubMed Central PMCID: PMC6526499.
- 433 18. Gao YJ, Ji RR. c-Fos and pERK, which is a better marker for neuronal activation and central  
434 sensitization after noxious stimulation and tissue injury? *Open Pain J.* 2009;2:11-7. Epub 2009/11/10.  
435 doi: 10.2174/1876386300902010011. PubMed PMID: 19898681; PubMed Central PMCID:  
436 PMC6526499.
- 437 19. Feng Y, Cui M, Willis WD. Gabapentin markedly reduces acetic acid-induced visceral nociception.  
438 *Anesthesiology.* 2003;98(3):729-33. Epub 2003/02/28. PubMed PMID: 12606919.
- 439 20. Langford DJ, Bailey AL, Chanda ML, Clarke SE, Drummond TE, Echols S, et al. Coding of facial  
440 expressions of pain in the laboratory mouse. *Nat Methods.* 2010;7(6):447-9. Epub 2010/05/11. doi:  
441 10.1038/nmeth.1455. PubMed PMID: 20453868.
- 442 21. Uysal M, Gül SS, Karaman S, Tas U, Sapmaz HI, Uysal F, et al. Caecum location in laboratory rats  
443 and mice: an anatomical and radiological study. *Lab Anim.* 2016;51(3):245-55. doi:  
444 10.1177/0023677216658916.





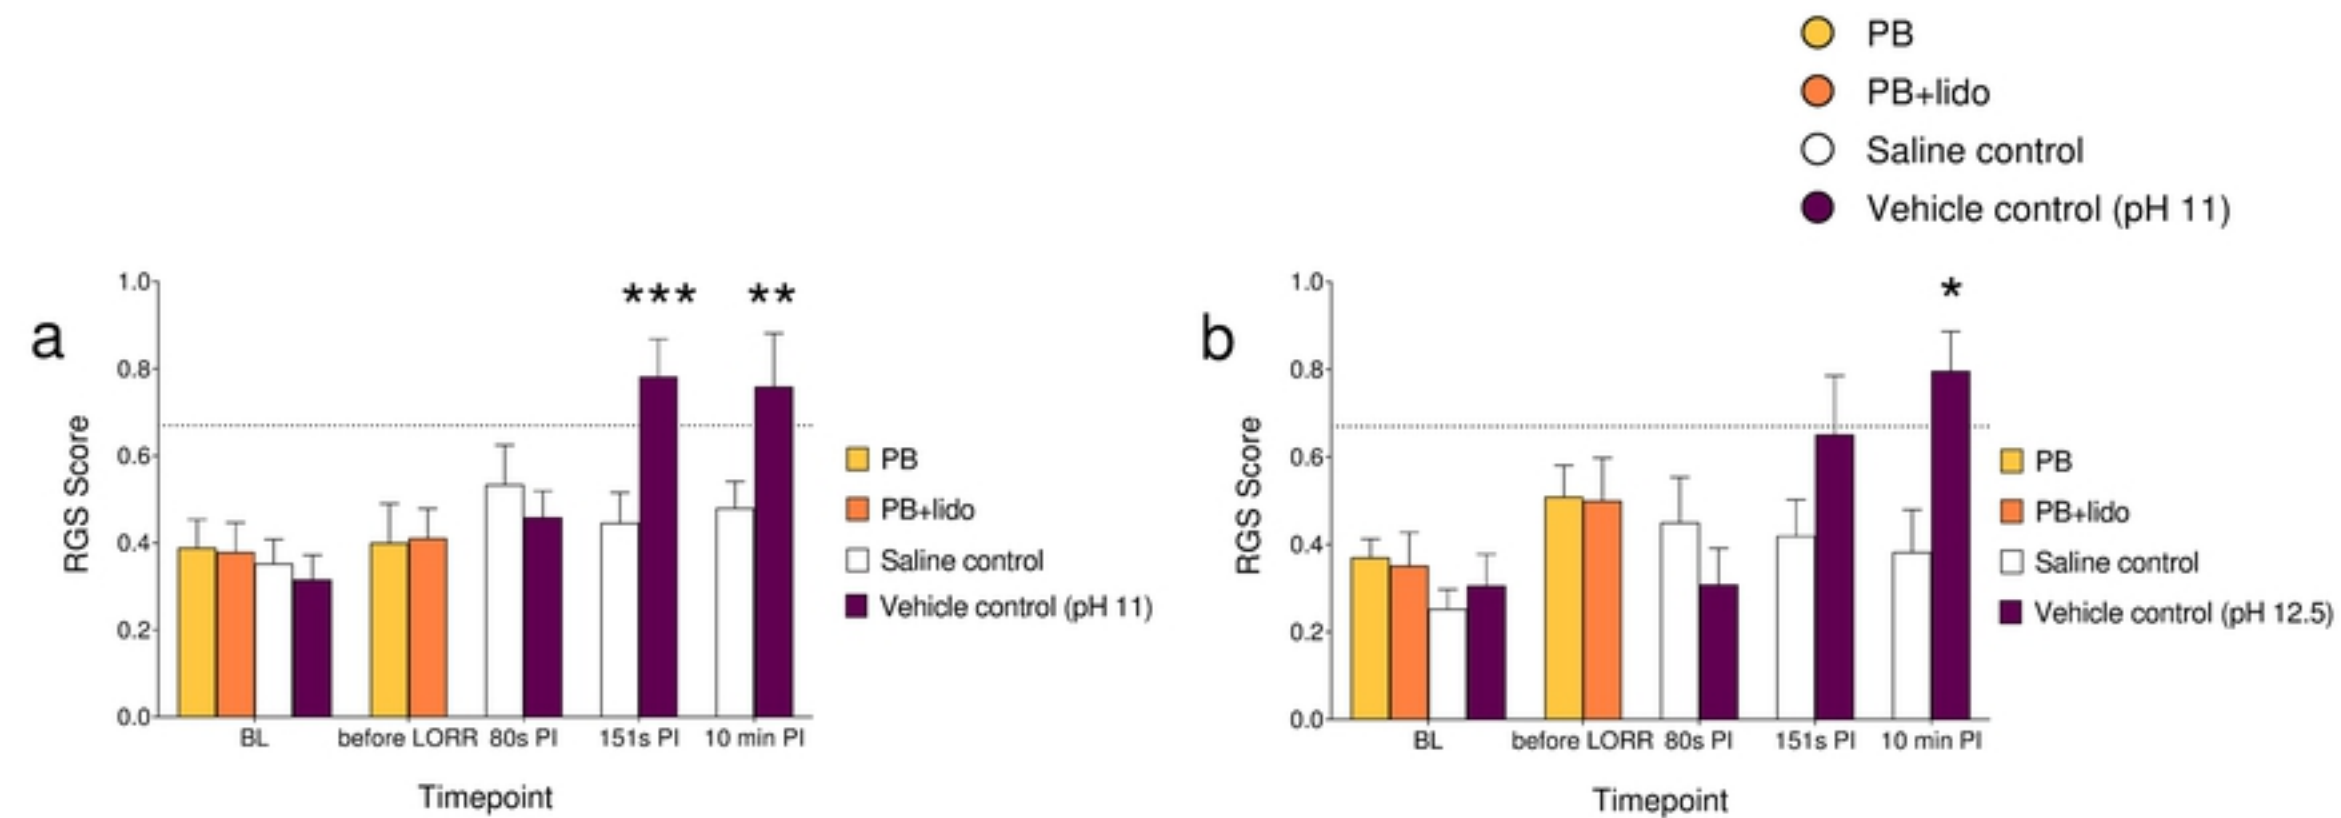

Fig 1
